# Supplementary material
Source: PubMed Central journal article supplement (PMC5483385)
Supplement: NIHMS838359-supplement-1.pdf [file NIHMS838359-supplement-1.pdf]

**Figure S1: Association of ADMA and SDMA with Outcomes in the HEMO Study**

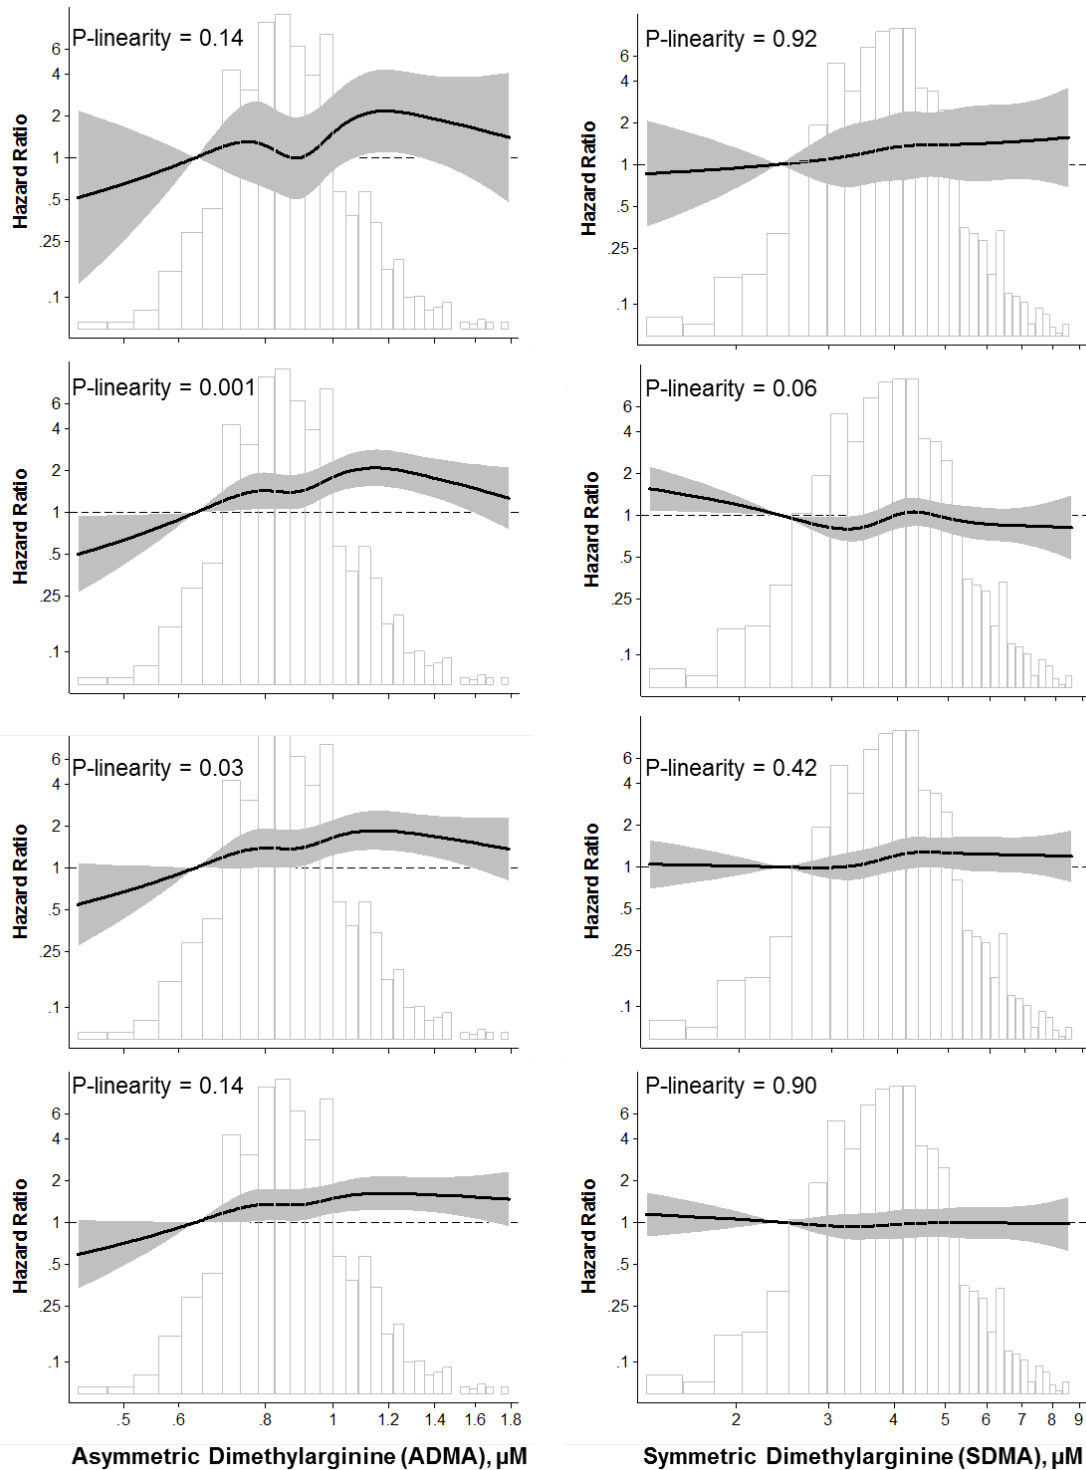

Relative hazard predicted using Cox proportional hazards regression adjusted for age, sex, race, Index of Coexisting Disease (ICED) severity score, cause of end-stage renal disease, body mass index (categorized as <18, 18 to 25 and >25 kg/m<sup>2</sup>), systolic blood pressure (categorized as <130, 130-160 and >160 mm Hg), albumin,

relative volume removed on dialysis, and residual kidney function (urinary  $\text{stdKt}/V_{\text{UREA}}$  calculated from urinary urea clearance). ADMA and SDMA are modeled as a restricted cubic spline with 5 knots (5<sup>th</sup>, 27.5<sup>th</sup>, 50<sup>th</sup>, 72.5<sup>th</sup> and 95<sup>th</sup> percentiles); 10th percentile is used as the reference (HR = 1). The lines represent the adjusted HR and the shaded area is the 95% CI of the HR. Vertical bars are the frequency histogram, showing the distribution of the solutes. Extreme observations, defined as values >99<sup>th</sup> percentile, are excluded; ADMA >1.8  $\mu\text{M}$  (n=12) and SDMA >8.6  $\mu\text{M}$  (n=12).

Panel A (left): Asymmetric Dimethylarginine (ADMA) and Outcomes

Panel B (right): Symmetric Dimethylarginine (SDMA) and Outcomes.
