# Supplementary material
Source: PubMed Central journal article supplement (PMC5483385)
Supplement: NIHMS838359-supplement-2.pdf [file NIHMS838359-supplement-2.pdf]

**Table S1. Comparison of the Baseline Characteristics of the Included versus Excluded Participants**

| Characteristic                                 | All          | Included     | Excluded     | P <sup>a</sup>   |
|------------------------------------------------|--------------|--------------|--------------|------------------|
| <b>Number</b>                                  | 1846         | 1276         | 570          |                  |
| Attributed cause of End-Stage Renal Disease    |              |              |              | 0.2              |
| Diabetes                                       | 686 (37.2)   | 483 (37.9)   | 203 (35.6)   |                  |
| Hypertension                                   | 586 (31.7)   | 404 (31.7)   | 182 (31.9)   |                  |
| Polycystic Kidney Disease                      | 58 (3.1)     | 33 (2.6)     | 25 (4.4)     |                  |
| Other                                          | 516 (28.0)   | 356 (27.9)   | 160 (28.1)   |                  |
| <b>Dialysis Characteristics</b>                |              |              |              |                  |
| Years of prior dialysis                        | 3.7 ± 4.4    | 3.5 ± 4.1    | 4.4 ± 4.8    | <b>&lt;0.001</b> |
| Residual kidney urea clearance > 0             | 607 (32.9)   | 434 (34.0)   | 173 (30.4)   | 0.1              |
| Residual Kidney Urea Clearance, ml/min/35L TBW | 0.2 ± 0.5    | 0.3 ± 0.5    | 0.2 ± 0.4    | 0.05             |
| Residual stdKt/V <sub>UREA</sub>               | 0.1 ± 0.1    | 0.1 ± 0.1    | 0.1 ± 0.1    | 0.06             |
| Predialysis systolic blood pressure            | 151.8 ± 22.1 | 152.6 ± 21.9 | 150.0 ± 22.7 | <b>0.02</b>      |
| Target weight, Kg                              | 68.9 ± 14.6  | 69.4 ± 14.9  | 67.8 ± 13.9  | <b>0.03</b>      |
| Body Mass Index, Kg/m <sup>2</sup>             | 25.5 ± 5.2   | 25.6 ± 5.3   | 25.1 ± 5.1   | 0.06             |
| Number of reuse of the dialyzer                | 6.4 ± 5.3    | 6.5 ± 5.4    | 6.2 ± 4.9    | 0.3              |
| Relative volume removed                        | 4.1 ± 1.5    | 4.0 ± 1.5    | 4.1 ± 1.5    | 0.2              |
| High-dose group                                | 920 (49.8)   | 635 (49.8)   | 285 (50.0)   | 0.9              |
| High-flux group                                | 921 (49.9)   | 636 (49.8)   | 285 (50.0)   | 0.9              |
| <b>Predialysis Laboratory Tests</b>            |              |              |              |                  |
| Blood Urea Nitrogen, mg/dL                     | 56.7 ± 14.3  | 56.7 ± 14.7  | 56.8 ± 13.5  | 0.9              |
| Single-pool Kt/V                               | 1.6 ± 0.2    | 1.6 ± 0.2    | 1.6 ± 0.2    | <b>0.03</b>      |
| Serum albumin, g/dL                            | 3.6 ± 0.4    | 3.6 ± 0.3    | 3.6 ± 0.4    | 0.4              |
| Serum β2-microglobulin                         | 36.3 ± 13.5  | 35.7 ± 13.7  | 37.8 ± 12.8  | <b>0.003</b>     |
| Equilibrated nPCR, g/kg/day                    | 1.0 ± 0.2    | 1.0 ± 0.2    | 1.0 ± 0.2    | 0.9              |
| <b>Dietary recall</b>                          |              |              |              |                  |
| Total protein, g/kg ABW/day                    | 0.9 ± 0.3    | 0.9 ± 0.3    | 0.9 ± 0.3    | 0.9              |
| Fat %                                          | 35.4 ± 7.8   | 35.5 ± 7.6   | 35.2 ± 8.3   | 0.5              |
| Carbohydrates %                                | 48.6 ± 9.4   | 48.4 ± 9.3   | 49.0 ± 9.8   | 0.2              |

Note: Values for categorical variables are given as number (percentage); values for continuous variables are given as mean ± standard deviation.

<sup>a</sup> P values were calculated from one-way ANOVA for continuous variables and Fisher's exact test for categorical variables.

All data presented in the table is from the baseline visit.
