# Supplementary material
Source: PubMed Central journal article supplement (PMC5483385)
Supplement: NIHMS838359-supplement-3.pdf [file NIHMS838359-supplement-3.pdf]

**Table S2: Association of ADMA and SDMA Quintiles and Outcomes in the HEMO Study**

|                                                      | Range, $\mu\text{M}$ | N   | Events | IR Per 1000 PY | Model 1                 |                 | Model 2                 |                 | Model 3                 |                 | Model 4                 |                 |
|------------------------------------------------------|----------------------|-----|--------|----------------|-------------------------|-----------------|-------------------------|-----------------|-------------------------|-----------------|-------------------------|-----------------|
|                                                      |                      |     |        |                | HR (95% CI)             | P               |
| <b>Cardiac Death</b>                                 |                      |     |        |                |                         |                 |                         |                 |                         |                 |                         |                 |
| <b>ADMA</b>                                          |                      |     |        |                |                         |                 |                         |                 |                         |                 |                         |                 |
| Quintile 1                                           | 0.43-0.744           | 255 | 33     | 44.1           | Reference               |                 | Reference               |                 | Reference               |                 | Reference               |                 |
| Quintile 2                                           | 0.745-0.841          | 254 | 39     | 61.0           | 1.39 (0.95-2.02)        | 0.09            | 1.42 (0.97-2.07)        | 0.07            | 1.23 (0.85-1.77)        | 0.3             | 1.23 (0.86-1.76)        | 0.3             |
| Quintile 3                                           | 0.842-0.938          | 255 | 44     | 66.8           | 1.52 (0.98-2.34)        | 0.06            | 1.44 (0.88-2.34)        | 0.1             | 1.35 (0.83-2.20)        | 0.2             | 1.35 (0.83-2.18)        | 0.2             |
| Quintile 4                                           | 0.939-1.06           | 254 | 38     | 60.3           | 1.37 (0.94-2.00)        | 0.1             | 1.38 (0.97-1.97)        | 0.08            | 1.19 (0.80-1.76)        | 0.4             | 1.18 (0.80-1.76)        | 0.4             |
| Quintile 5                                           | 1.07-2.56            | 258 | 66     | 108.8          | <b>2.56 (1.80-3.64)</b> | <b>&lt;.001</b> | <b>2.66 (1.88-3.74)</b> | <b>&lt;.001</b> | <b>2.12 (1.47-3.06)</b> | <b>&lt;.001</b> | <b>2.10 (1.44-3.05)</b> | <b>&lt;.001</b> |
| p-trend                                              |                      |     |        |                |                         | <b>&lt;.001</b> |                         | <b>&lt;.001</b> |                         | <b>&lt;.001</b> |                         | <b>&lt;.001</b> |
| <b>SDMA</b>                                          |                      |     |        |                |                         |                 |                         |                 |                         |                 |                         |                 |
| Quintile 1                                           | 1.35-3.11            | 255 | 47     | 71.7           | Reference               |                 | Reference               |                 | Reference               |                 | Reference               |                 |
| Quintile 2                                           | 3.12-3.78            | 255 | 44     | 63.3           | 0.88 (0.56-1.37)        | 0.6             | 1.01 (0.66-1.56)        | 0.9             | 1.08 (0.76-1.53)        | 0.7             | 1.07 (0.76-1.52)        | 0.7             |
| Quintile 3                                           | 3.79-4.41            | 256 | 53     | 86.6           | 1.21 (0.90-1.63)        | 0.2             | <b>1.48 (1.10-1.99)</b> | <b>0.01</b>     | <b>1.59 (1.18-2.14)</b> | <b>0.002</b>    | <b>1.57 (1.16-2.12)</b> | <b>0.003</b>    |
| Quintile 4                                           | 4.42-5.19            | 255 | 38     | 55.2           | 0.76 (0.54-1.07)        | 0.1             | 1.12 (0.79-1.57)        | 0.5             | 1.28 (0.82-2.00)        | 0.3             | 1.27 (0.82-1.97)        | 0.3             |
| Quintile 5                                           | 5.2-12.8             | 255 | 38     | 60.2           | 0.83 (0.56-1.24)        | 0.4             | 1.27 (0.86-1.88)        | 0.2             | 1.47 (0.99-2.20)        | 0.06            | 1.44 (0.95-2.20)        | 0.09            |
| p-trend                                              |                      |     |        |                |                         | 0.2             |                         | 0.2             |                         | <b>0.03</b>     |                         | <b>0.05</b>     |
| <b>Sudden Cardiac Death</b>                          |                      |     |        |                |                         |                 |                         |                 |                         |                 |                         |                 |
| <b>ADMA</b>                                          |                      |     |        |                |                         |                 |                         |                 |                         |                 |                         |                 |
| Quintile 1                                           | 0.43-0.744           | 255 | 20     | 26.8           | Reference               |                 | Reference               |                 | Reference               |                 | Reference               |                 |
| Quintile 2                                           | 0.745-0.841          | 254 | 22     | 34.4           | 1.30 (0.81-2.09)        | 0.3             | 1.34 (0.84-2.15)        | 0.2             | 1.17 (0.78-1.74)        | 0.4             | 1.17 (0.79-1.74)        | 0.4             |
| Quintile 3                                           | 0.842-0.938          | 255 | 23     | 34.9           | 1.33 (0.82-2.18)        | 0.2             | 1.28 (0.79-2.07)        | 0.3             | 1.17 (0.70-1.94)        | 0.5             | 1.17 (0.70-1.94)        | 0.5             |
| Quintile 4                                           | 0.939-1.06           | 254 | 22     | 34.9           | 1.35 (0.88-2.05)        | 0.2             | 1.35 (0.90-2.03)        | 0.1             | 1.15 (0.76-1.74)        | 0.5             | 1.15 (0.75-1.75)        | 0.5             |
| Quintile 5                                           | 1.07-2.56            | 258 | 39     | 64.3           | <b>2.57 (1.89-3.50)</b> | <b>&lt;.001</b> | <b>2.65 (2.05-3.43)</b> | <b>&lt;.001</b> | <b>2.07 (1.49-2.89)</b> | <b>&lt;.001</b> | <b>2.06 (1.46-2.90)</b> | <b>&lt;.001</b> |
| p-trend                                              |                      |     |        |                |                         | <b>&lt;.001</b> |                         | <b>&lt;.001</b> |                         | <b>0.002</b>    |                         | <b>0.003</b>    |
| <b>SDMA</b>                                          |                      |     |        |                |                         |                 |                         |                 |                         |                 |                         |                 |
| Quintile 1                                           | 1.35-3.11            | 255 | 28     | 42.7           | Reference               |                 | Reference               |                 | Reference               |                 | Reference               |                 |
| Quintile 2                                           | 3.12-3.78            | 255 | 25     | 36.0           | 0.85 (0.38-1.88)        | 0.7             | 0.97 (0.45-2.09)        | 0.9             | 1.04 (0.55-1.97)        | 0.9             | 1.04 (0.55-1.97)        | 0.9             |
| Quintile 3                                           | 3.79-4.41            | 256 | 27     | 44.1           | 1.04 (0.60-1.81)        | 0.9             | 1.26 (0.72-2.22)        | 0.4             | 1.39 (0.82-2.37)        | 0.2             | 1.38 (0.80-2.37)        | 0.2             |
| Quintile 4                                           | 4.42-5.19            | 255 | 24     | 34.8           | 0.83 (0.44-1.54)        | 0.5             | 1.16 (0.64-2.08)        | 0.6             | 1.36 (0.70-2.64)        | 0.4             | 1.36 (0.70-2.62)        | 0.4             |
| Quintile 5                                           | 5.2-12.8             | 255 | 22     | 34.9           | 0.81 (0.42-1.55)        | 0.5             | 1.20 (0.63-2.29)        | 0.6             | 1.51 (0.82-2.76)        | 0.2             | 1.48 (0.80-2.76)        | 0.2             |
| p-trend                                              |                      |     |        |                |                         | 0.5             |                         | 0.4             |                         | 0.1             |                         | 0.1             |
| <b>First Cardiovascular Event or Any-Cause Death</b> |                      |     |        |                |                         |                 |                         |                 |                         |                 |                         |                 |
| <b>ADMA</b>                                          |                      |     |        |                |                         |                 |                         |                 |                         |                 |                         |                 |
| Quintile 1                                           | 0.43-0.744           | 241 | 105    | 186.1          | Reference               |                 | Reference               |                 | Reference               |                 | Reference               |                 |
| Quintile 2                                           | 0.745-0.841          | 234 | 125    | 276.0          | <b>1.50 (1.23-1.82)</b> | <b>&lt;.001</b> | <b>1.60 (1.30-1.97)</b> | <b>&lt;.001</b> | <b>1.53 (1.24-1.88)</b> | <b>&lt;.001</b> | <b>1.53 (1.25-1.88)</b> | <b>&lt;.001</b> |
| Quintile 3                                           | 0.842-0.938          | 240 | 126    | 261.2          | <b>1.41 (1.13-1.76)</b> | <b>0.003</b>    | <b>1.37 (1.09-1.73)</b> | <b>0.007</b>    | <b>1.35 (1.05-1.72)</b> | <b>0.02</b>     | <b>1.35 (1.05-1.72)</b> | <b>0.02</b>     |
| Quintile 4                                           | 0.939-1.06           | 236 | 150    | 338.7          | <b>1.83 (1.48-2.25)</b> | <b>&lt;.001</b> | <b>1.83 (1.46-2.29)</b> | <b>&lt;.001</b> | <b>1.69 (1.35-2.10)</b> | <b>&lt;.001</b> | <b>1.69 (1.36-2.10)</b> | <b>&lt;.001</b> |

|                                                                   |             |     |     |       |                         |                 |                         |                 |                         |                 |                         |                 |
|-------------------------------------------------------------------|-------------|-----|-----|-------|-------------------------|-----------------|-------------------------|-----------------|-------------------------|-----------------|-------------------------|-----------------|
| Quintile 5                                                        | 1.07-2.56   | 235 | 138 | 337.5 | <b>1.82 (1.45-2.29)</b> | <b>&lt;.001</b> | <b>1.89 (1.49-2.42)</b> | <b>&lt;.001</b> | <b>1.74 (1.35-2.26)</b> | <b>&lt;.001</b> | <b>1.75 (1.35-2.27)</b> | <b>&lt;.001</b> |
| p-trend                                                           |             |     |     |       |                         | <b>&lt;.001</b> |                         | <b>&lt;.001</b> |                         | <b>&lt;.001</b> |                         | <b>&lt;.001</b> |
| <b>SDMA</b>                                                       |             |     |     |       |                         |                 |                         |                 |                         |                 |                         |                 |
| Quintile 1                                                        | 1.35-3.11   | 237 | 145 | 331.6 | Reference               |                 | Reference               |                 | Reference               |                 | Reference               |                 |
| Quintile 2                                                        | 3.12-3.78   | 237 | 120 | 233.9 | <b>0.69 (0.57-0.84)</b> | <b>&lt;.001</b> | <b>0.77 (0.66-0.90)</b> | <b>0.001</b>    | <b>0.78 (0.67-0.91)</b> | <b>0.002</b>    | <b>0.78 (0.67-0.91)</b> | <b>0.002</b>    |
| Quintile 3                                                        | 3.79-4.41   | 242 | 154 | 357.5 | 1.06 (0.87-1.30)        | 0.6             | <b>1.20 (1.01-1.43)</b> | <b>0.04</b>     | 1.14 (0.94-1.38)        | 0.2             | 1.14 (0.94-1.38)        | 0.2             |
| Quintile 4                                                        | 4.42-5.19   | 238 | 115 | 224.2 | <b>0.66 (0.53-0.82)</b> | <b>&lt;.001</b> | 0.87 (0.70-1.08)        | 0.2             | 0.91 (0.75-1.10)        | 0.3             | 0.90 (0.74-1.10)        | 0.3             |
| Quintile 5                                                        | 5.2-12.8    | 232 | 110 | 240.6 | <b>0.70 (0.51-0.94)</b> | <b>0.02</b>     | 0.96 (0.71-1.29)        | 0.8             | 0.99 (0.73-1.34)        | 0.9             | 1.00 (0.74-1.35)        | 0.9             |
| p-trend                                                           |             |     |     |       |                         | <b>0.02</b>     |                         | 0.9             |                         | 0.7             |                         | 0.6             |
| <b>Any-Cause Death</b>                                            |             |     |     |       |                         |                 |                         |                 |                         |                 |                         |                 |
| <b>ADMA</b>                                                       |             |     |     |       |                         |                 |                         |                 |                         |                 |                         |                 |
| Quintile 1                                                        | 0.43-0.744  | 255 | 87  | 116.4 | Reference               |                 | Reference               |                 | Reference               |                 | Reference               |                 |
| Quintile 2                                                        | 0.745-0.841 | 254 | 113 | 176.8 | <b>1.52 (1.26-1.84)</b> | <b>&lt;.001</b> | <b>1.57 (1.28-1.93)</b> | <b>&lt;.001</b> | <b>1.43 (1.17-1.73)</b> | <b>&lt;.001</b> | <b>1.43 (1.17-1.73)</b> | <b>&lt;.001</b> |
| Quintile 3                                                        | 0.842-0.938 | 255 | 111 | 168.4 | <b>1.40 (1.17-1.68)</b> | <b>&lt;.001</b> | <b>1.35 (1.09-1.67)</b> | <b>0.006</b>    | 1.27 (0.98-1.63)        | 0.07            | 1.27 (0.98-1.63)        | 0.07            |
| Quintile 4                                                        | 0.939-1.06  | 254 | 127 | 201.6 | <b>1.71 (1.36-2.15)</b> | <b>&lt;.001</b> | <b>1.76 (1.42-2.16)</b> | <b>&lt;.001</b> | <b>1.56 (1.20-2.04)</b> | <b>&lt;.001</b> | <b>1.56 (1.20-2.04)</b> | <b>&lt;.001</b> |
| Quintile 5                                                        | 1.07-2.56   | 258 | 127 | 209.4 | <b>1.77 (1.43-2.19)</b> | <b>&lt;.001</b> | <b>1.86 (1.50-2.31)</b> | <b>&lt;.001</b> | <b>1.56 (1.22-2.00)</b> | <b>&lt;.001</b> | <b>1.56 (1.21-2.00)</b> | <b>&lt;.001</b> |
| p-trend                                                           |             |     |     |       |                         | <b>&lt;.001</b> |                         | <b>&lt;.001</b> |                         | <b>0.003</b>    |                         | <b>0.004</b>    |
| <b>SDMA</b>                                                       |             |     |     |       |                         |                 |                         |                 |                         |                 |                         |                 |
| Quintile 1                                                        | 1.35-3.11   | 255 | 129 | 196.9 | Reference               |                 | Reference               |                 | Reference               |                 | Reference               |                 |
| Quintile 2                                                        | 3.12-3.78   | 255 | 104 | 149.7 | <b>0.73 (0.57-0.95)</b> | <b>0.02</b>     | 0.83 (0.66-1.06)        | 0.1             | 0.87 (0.69-1.10)        | 0.2             | 0.87 (0.69-1.10)        | 0.2             |
| Quintile 3                                                        | 3.79-4.41   | 256 | 133 | 217.2 | 1.08 (0.87-1.34)        | 0.5             | <b>1.27 (1.04-1.56)</b> | <b>0.02</b>     | <b>1.29 (1.03-1.62)</b> | <b>0.02</b>     | <b>1.29 (1.03-1.62)</b> | <b>0.03</b>     |
| Quintile 4                                                        | 4.42-5.19   | 255 | 98  | 142.2 | <b>0.68 (0.54-0.85)</b> | <b>&lt;.001</b> | 0.97 (0.81-1.16)        | 0.7             | 1.05 (0.83-1.32)        | 0.7             | 1.05 (0.83-1.32)        | 0.7             |
| Quintile 5                                                        | 5.2-12.8    | 255 | 101 | 160.1 | 0.77 (0.58-1.03)        | 0.07            | 1.13 (0.84-1.52)        | 0.4             | 1.24 (0.94-1.64)        | 0.1             | 1.24 (0.93-1.65)        | 0.1             |
| p-trend                                                           |             |     |     |       |                         | 0.06            |                         | 0.2             |                         | <b>0.04</b>     |                         | 0.05            |
| <b>First Infection-Related Hospitalization or Any-Cause Death</b> |             |     |     |       |                         |                 |                         |                 |                         |                 |                         |                 |
| <b>ADMA</b>                                                       |             |     |     |       |                         |                 |                         |                 |                         |                 |                         |                 |
| Quintile 1                                                        | 0.43-0.744  | 246 | 119 | 219.4 | Reference               |                 | Reference               |                 | Reference               |                 | Reference               |                 |
| Quintile 2                                                        | 0.745-0.841 | 240 | 134 | 300.4 | <b>1.38 (1.16-1.63)</b> | <b>&lt;.001</b> | <b>1.40 (1.18-1.67)</b> | <b>&lt;.001</b> | <b>1.30 (1.09-1.55)</b> | <b>0.003</b>    | <b>1.30 (1.09-1.55)</b> | <b>0.003</b>    |
| Quintile 3                                                        | 0.842-0.938 | 239 | 129 | 280.1 | 1.25 (0.99-1.56)        | 0.06            | 1.23 (0.96-1.58)        | 0.1             | 1.22 (0.95-1.56)        | 0.1             | 1.22 (0.95-1.55)        | 0.1             |
| Quintile 4                                                        | 0.939-1.06  | 230 | 143 | 336.9 | <b>1.53 (1.19-1.97)</b> | <b>&lt;.001</b> | <b>1.54 (1.19-1.99)</b> | <b>0.001</b>    | <b>1.42 (1.10-1.83)</b> | <b>0.007</b>    | <b>1.41 (1.10-1.82)</b> | <b>0.007</b>    |
| Quintile 5                                                        | 1.07-2.56   | 228 | 138 | 354.0 | <b>1.60 (1.31-1.96)</b> | <b>&lt;.001</b> | <b>1.63 (1.33-2.00)</b> | <b>&lt;.001</b> | <b>1.46 (1.20-1.79)</b> | <b>&lt;.001</b> | <b>1.46 (1.19-1.78)</b> | <b>&lt;.001</b> |
| p-trend                                                           |             |     |     |       |                         | <b>&lt;.001</b> |                         | <b>&lt;.001</b> |                         | <b>0.001</b>    |                         | <b>0.001</b>    |
| <b>SDMA</b>                                                       |             |     |     |       |                         |                 |                         |                 |                         |                 |                         |                 |
| Quintile 1                                                        | 1.35-3.11   | 240 | 145 | 337.4 | Reference               |                 | Reference               |                 | Reference               |                 | Reference               |                 |
| Quintile 2                                                        | 3.12-3.78   | 233 | 126 | 259.9 | <b>0.76 (0.58-1.00)</b> | <b>0.05</b>     | 0.83 (0.66-1.05)        | 0.1             | 0.84 (0.69-1.02)        | 0.08            | 0.84 (0.70-1.02)        | 0.09            |
| Quintile 3                                                        | 3.79-4.41   | 246 | 151 | 345.5 | 1.01 (0.87-1.19)        | 0.9             | 1.10 (0.96-1.27)        | 0.2             | 1.09 (0.92-1.28)        | 0.3             | 1.09 (0.92-1.28)        | 0.3             |
| Quintile 4                                                        | 4.42-5.19   | 226 | 117 | 245.9 | <b>0.71 (0.60-0.85)</b> | <b>&lt;.001</b> | 0.86 (0.72-1.03)        | 0.1             | 0.90 (0.74-1.10)        | 0.3             | 0.90 (0.74-1.11)        | 0.3             |
| Quintile 5                                                        | 5.2-12.8    | 238 | 124 | 284.6 | 0.82 (0.67-1.01)        | 0.06            | 1.00 (0.83-1.20)        | 0.9             | 1.06 (0.88-1.28)        | 0.5             | 1.06 (0.87-1.28)        | 0.6             |
| p-trend                                                           |             |     |     |       |                         | 0.1             |                         | 0.8             |                         | 0.4             |                         | 0.4             |

Abbreviation: IR, Incidence Rate; HR, Hazard Ratio; CI, Confidence Interval; ADMA, Asymmetric Dimethylarginine; SDMA, Symmetric Dimethylarginine  
 HR represents increase in risk per 2-fold increase in ADMA or SDMA concentrations. Modeled as natural log transformed variable/natural log of 2.

*Shafi et al, AJKD, "Serum Asymmetric and Symmetric Dimethylarginine and Morbidity and Mortality in Hemodialysis Patients"*

Model 1 was unadjusted.

Model 2 adjusted for age, sex and race.

Model 3 adjusted for variables in Model 2 + Index of Coexisting Disease (ICED) severity score, cause of end-stage renal disease, body mass index (categorized as <18, 18 to 25 and >25 kg/m<sup>2</sup>), systolic blood pressure (categorized as <130, 130-160 and >160 mm Hg), albumin, and relative volume removed on dialysis

Model 4 adjusted for variables in Model 3 + residual kidney function (urinary stdKt/V<sub>UREA</sub> calculated from urinary urea clearance).
