# Supplementary material
Source: PubMed Central journal article supplement (PMC5483385)
Supplement: NIHMS838359-supplement-4.pdf [file NIHMS838359-supplement-4.pdf]

**Table S3: Association of ADMA Categorized and Outcomes in the HEMO Study**

|                                                                   |           |      |        |                | Model 1                 |                 | Model 2                 |                 | Model 3                 |                 | Model 4                 |                 |
|-------------------------------------------------------------------|-----------|------|--------|----------------|-------------------------|-----------------|-------------------------|-----------------|-------------------------|-----------------|-------------------------|-----------------|
|                                                                   | Range, µM | N    | Events | IR Per 1000 PY | HR (95% CI)             | P               |
| <b>Cardiac Death</b>                                              |           |      |        |                |                         |                 |                         |                 |                         |                 |                         |                 |
| <b>ADMA</b>                                                       |           |      |        |                |                         |                 |                         |                 |                         |                 |                         |                 |
| Quintile 1 to 4                                                   | 0.43-1.06 | 1018 | 154    | 57.6           | Reference               |                 | Reference               |                 | Reference               |                 | Reference               |                 |
| Quintile 5                                                        | 1.07-2.56 | 258  | 66     | 108.8          | <b>1.96 (1.48-2.59)</b> | <b>&lt;.001</b> | <b>2.04 (1.55-2.68)</b> | <b>&lt;.001</b> | <b>1.78 (1.36-2.31)</b> | <b>&lt;.001</b> | <b>1.76 (1.34-2.31)</b> | <b>&lt;.001</b> |
| <b>Sudden Cardiac Death</b>                                       |           |      |        |                |                         |                 |                         |                 |                         |                 |                         |                 |
| <b>ADMA</b>                                                       |           |      |        |                |                         |                 |                         |                 |                         |                 |                         |                 |
| Quintile 1 to 4                                                   | 0.43-1.06 | 1018 | 87     | 32.5           | Reference               |                 | Reference               |                 | Reference               |                 | Reference               |                 |
| Quintile 5                                                        | 1.07-2.56 | 258  | 39     | 64.3           | <b>2.08 (1.42-3.03)</b> | <b>&lt;.001</b> | <b>2.15 (1.52-3.04)</b> | <b>&lt;.001</b> | <b>1.85 (1.30-2.62)</b> | <b>&lt;.001</b> | <b>1.83 (1.28-2.63)</b> | <b>0.001</b>    |
| <b>First Cardiovascular Event or Any-Cause Death</b>              |           |      |        |                |                         |                 |                         |                 |                         |                 |                         |                 |
| <b>ADMA</b>                                                       |           |      |        |                |                         |                 |                         |                 |                         |                 |                         |                 |
| Quintile 1 to 4                                                   | 0.43-1.06 | 951  | 506    | 260.5          | Reference               |                 | Reference               |                 | Reference               |                 | Reference               |                 |
| Quintile 5                                                        | 1.07-2.56 | 235  | 138    | 337.5          | <b>1.30 (1.07-1.57)</b> | <b>0.008</b>    | <b>1.32 (1.09-1.60)</b> | <b>0.005</b>    | <b>1.25 (1.03-1.53)</b> | <b>0.02</b>     | <b>1.26 (1.03-1.54)</b> | <b>0.02</b>     |
| <b>Any-Cause Death</b>                                            |           |      |        |                |                         |                 |                         |                 |                         |                 |                         |                 |
| <b>ADMA</b>                                                       |           |      |        |                |                         |                 |                         |                 |                         |                 |                         |                 |
| Quintile 1 to 4                                                   | 0.43-1.06 | 1018 | 438    | 163.7          | Reference               |                 | Reference               |                 | Reference               |                 | Reference               |                 |
| Quintile 5                                                        | 1.07-2.56 | 258  | 127    | 209.4          | <b>1.27 (1.04-1.56)</b> | <b>0.02</b>     | <b>1.32 (1.11-1.58)</b> | <b>0.002</b>    | <b>1.18 (1.01-1.39)</b> | <b>0.04</b>     | 1.18 (0.99-1.40)        | 0.06            |
| <b>First Infection-Related Hospitalization or Any-Cause Death</b> |           |      |        |                |                         |                 |                         |                 |                         |                 |                         |                 |
| Quintile 1 to 4                                                   | 0.43-1.06 | 955  | 525    | 280.3          | Reference               |                 | Reference               |                 | Reference               |                 | Reference               |                 |
| Quintile 5                                                        | 1.07-2.56 | 228  | 138    | 354.0          | <b>1.26 (1.12-1.42)</b> | <b>&lt;.001</b> | <b>1.28 (1.14-1.43)</b> | <b>&lt;.001</b> | <b>1.19 (1.06-1.34)</b> | <b>0.004</b>    | <b>1.18 (1.05-1.33)</b> | <b>0.005</b>    |

*Abbreviation:* IR, Incidence Rate; HR, Hazard Ratio; CI, Confidence Interval; ADMA, Asymmetric Dimethylarginine; SDMA, Symmetric Dimethylarginine  
 HR represents increase in risk per 2-fold increase in ADMA or SDMA concentrations. Modeled as natural log transformed variable/natural log of 2.

Model 1 was unadjusted.

Model 2 adjusted for age, sex and race.

Model 3 adjusted for variables in Model 2 + Index of Coexisting Disease (ICED) severity score, cause of end-stage renal disease, body mass index (categorized as <18, 18 to 25 and >25 kg/m<sup>2</sup>), systolic blood pressure (categorized as <130, 130-160 and >160 mm Hg), albumin, and relative volume removed on dialysis

Model 4 adjusted for variables in Model 3 + residual kidney function (urinary stdKt/V<sub>UREA</sub> calculated from urinary urea clearance).
