# Supplementary material
Source: PubMed Central journal article supplement (PMC5483385)
Supplement: NIHMS838359-supplement-5.pdf [file NIHMS838359-supplement-5.pdf]

**Table S4: Sub-group Analyses for the Association between ADMA and Outcomes in the HEMO Study**

| Strata (N)                           | Cardiac Death    |                | Sudden Cardiac Death |                | First Cardiovascular Event or Any-Cause Death |                | Any-Cause Death  |                |
|--------------------------------------|------------------|----------------|----------------------|----------------|-----------------------------------------------|----------------|------------------|----------------|
|                                      | HR (95% CI)      | P <sup>1</sup> | HR (95% CI)          | P <sup>1</sup> | HR (95% CI)                                   | P <sup>1</sup> | HR (95% CI)      | P <sup>1</sup> |
| Entire Sample Overall (1276)         | 1.83 (1.29-2.58) |                | 1.79 (1.19-2.69)     |                | 1.50 (1.20-1.87)                              |                | 1.44 (1.13-1.83) |                |
| Age < 59 years (638)                 | 2.84 (1.56-5.18) | 0.1            | 3.14 (1.28-7.69)     | 0.1            | 1.39 (0.97-1.98)                              | 0.6            | 1.51 (1.00-2.29) | 0.8            |
| Age ≥ 59 years (638)                 | 1.45 (0.89-2.37) |                | 1.21 (0.71-2.07)     |                | 1.59 (1.16-2.16)                              |                | 1.40 (1.00-1.98) |                |
| Male (552)                           | 1.63 (0.90-2.95) | 0.5            | 1.94 (1.00-3.77)     | 0.7            | 1.73 (1.21-2.48)                              | 0.2            | 1.50 (1.03-2.18) | 0.8            |
| Female (724)                         | 2.01 (1.38-2.93) |                | 1.67 (1.07-2.60)     |                | 1.37 (1.08-1.73)                              |                | 1.39 (0.99-1.95) |                |
| Non-Black (474)                      | 1.95 (1.18-3.22) | 0.8            | 2.36 (1.16-4.81)     | 0.3            | 1.36 (0.88-2.09)                              | 0.6            | 1.33 (0.96-1.82) | 0.5            |
| Black (801)                          | 1.74 (1.05-2.87) |                | 1.44 (0.87-2.37)     |                | 1.57 (1.22-2.02)                              |                | 1.51 (1.12-2.03) |                |
| Diabetes = No (699)                  | 2.11 (1.14-3.89) | 0.6            | 3.11 (1.49-6.51)     | <b>0.03</b>    | 1.35 (1.00-1.82)                              | 0.3            | 1.46 (1.02-2.08) | 0.9            |
| Diabetes = Yes (571)                 | 1.67 (1.08-2.59) |                | 1.28 (0.85-1.94)     |                | 1.67 (1.21-2.30)                              |                | 1.42 (1.07-1.88) |                |
| Cardiac Disease = No (271)           | 2.00 (0.67-5.95) | 0.8            | 0.61 (0.05-6.90)     | 0.4            | 2.13 (1.26-3.61)                              | 0.2            | 1.79 (1.00-3.20) | 0.5            |
| Cardiac Disease = Yes (1005)         | 1.75 (1.18-2.61) |                | 1.83 (1.17-2.86)     |                | 1.39 (1.06-1.83)                              |                | 1.37 (1.03-1.82) |                |
| GI Disease = No (798)                | 1.70 (1.07-2.72) | 0.6            | 1.58 (0.92-2.72)     | 0.6            | 1.69 (1.31-2.19)                              | 0.2            | 1.55 (1.18-2.02) | 0.4            |
| GI Disease = Yes (478)               | 2.06 (1.10-3.87) |                | 1.98 (1.04-3.79)     |                | 1.21 (0.82-1.79)                              |                | 1.32 (0.91-1.91) |                |
| BMI < 18 kg/m <sup>2</sup> (42)      | 7.61 (0.98-58.9) | 0.2            | 5.44 (0.37-79.6)     | 0.4            | 5.20 (0.76-35.7)                              | 0.2            | 3.13 (0.56-17.4) | 0.4            |
| BMI 18 to 25 kg/m <sup>2</sup> (621) | 2.04 (1.24-3.37) |                | 2.85 (1.40-5.78)     |                | 1.47 (1.15-1.89)                              |                | 1.75 (1.33-2.30) |                |
| BMI > 25 kg/m <sup>2</sup> (613)     | 1.57 (0.90-2.74) |                | 1.12 (0.57-2.19)     |                | 1.43 (1.02-2.01)                              |                | 1.14 (0.80-1.61) |                |
| Albumin < 3.6 g/dL (566)             | 1.93 (1.18-3.18) | 0.8            | 1.71 (0.87-3.37)     | 0.8            | 1.39 (1.08-1.77)                              | 0.4            | 1.37 (0.99-1.91) | 0.7            |
| Albumin ≥ 3.6 g/dL (704)             | 1.74 (0.89-3.40) |                | 1.98 (0.91-4.31)     |                | 1.61 (1.17-2.22)                              |                | 1.52 (1.04-2.23) |                |
| Standard Dose (641)                  | 1.56 (0.99-2.46) | 0.3            | 1.61 (0.86-3.02)     | 0.7            | 1.31 (0.95-1.82)                              | 0.2            | 1.29 (0.93-1.80) | 0.2            |
| High Dose (635)                      | 2.18 (1.39-3.43) |                | 1.99 (1.08-3.66)     |                | 1.69 (1.31-2.19)                              |                | 1.60 (1.24-2.07) |                |
| Low-Flux (640)                       | 1.41 (0.84-2.37) | 0.04           | 1.18 (0.62-2.24)     | <b>0.04</b>    | 1.51 (1.18-1.95)                              | 0.9            | 1.43 (1.00-2.04) | 0.9            |
| High-Flux (636)                      | 2.76 (1.97-3.86) |                | 3.32 (1.75-6.30)     |                | 1.46 (1.04-2.05)                              |                | 1.43 (1.03-1.98) |                |
| RKF = No (842)                       | 1.64 (1.12-2.40) | 0.09           | 1.51 (0.96-2.39)     | 0.2            | 1.50 (1.16-1.93)                              | 0.9            | 1.35 (1.01-1.81) | 0.2            |
| RKF = Yes (433)                      | 2.45 (1.60-3.75) |                | 2.79 (1.20-6.47)     |                | 1.51 (1.06-2.14)                              |                | 1.67 (1.28-2.16) |                |

Abbreviation: HR, Hazard Ratio; CI, Confidence Interval; ADMA, Asymmetric Dimethylarginine; GI, Gastrointestinal; BMI, Body Mass Index; RKF, Residual Kidney Function

HR represents increase in risk per 2-fold increase in ADMA or SDMA concentrations. Modeled as natural log transformed variable/natural log of 2.

Model 4 adjusted for age, sex, race, Index of Coexisting Disease (ICED) severity score, cause of end-stage renal disease, body mass index (categorized as <18, 18 to 25 and >25 kg/m<sup>2</sup>), systolic blood pressure (categorized as <130, 130-160 and >160 mm Hg), albumin, relative volume removed on dialysis and residual kidney function (urinary stdKt/V<sub>UREA</sub> calculated from urinary urea clearance).

<sup>1</sup> P-interactions between groups for the subgroup analyses.
