# Supplementary material
Source: PubMed Central journal article supplement (PMC5483385)
Supplement: NIHMS838359-supplement-6.pdf [file NIHMS838359-supplement-6.pdf]

**Table S5: Sub-group Analyses for the Association between SDMA and Outcomes in the HEMO Study**

| Strata (N)                           | Cardiac Death    |                | Sudden Cardiac Death |                | First Cardiovascular Event or Any-Cause Death |                | Any-Cause Death  |                |
|--------------------------------------|------------------|----------------|----------------------|----------------|-----------------------------------------------|----------------|------------------|----------------|
|                                      | HR (95% CI)      | P <sup>1</sup> | HR (95% CI)          | P <sup>1</sup> | HR (95% CI)                                   | P <sup>1</sup> | HR (95% CI)      | P <sup>1</sup> |
| Entire Sample Overall (1276)         | 1.40 (1.03-1.92) |                | 1.40 (0.96-2.06)     |                | 0.98 (0.83-1.16)                              |                | 1.21 (1.00-1.47) |                |
| Age < 59 years (638)                 | 1.33 (0.62-2.85) | 0.9            | 1.46 (0.51-4.20)     | 0.9            | 0.89 (0.62-1.27)                              | 0.5            | 1.16 (0.76-1.79) | 0.8            |
| Age ≥ 59 years (638)                 | 1.43 (0.97-2.11) |                | 1.38 (0.91-2.11)     |                | 1.03 (0.83-1.28)                              |                | 1.23 (0.96-1.58) |                |
| Male (552)                           | 1.30 (0.78-2.17) | 0.6            | 1.19 (0.59-2.41)     | 0.5            | 1.16 (0.75-1.80)                              | 0.3            | 1.31 (0.97-1.77) | 0.4            |
| Female (724)                         | 1.48 (1.13-1.94) |                | 1.57 (1.09-2.27)     |                | 0.90 (0.76-1.07)                              |                | 1.15 (0.96-1.37) |                |
| Non-Black (474)                      | 1.25 (0.78-2.00) | 0.4            | 1.31 (0.68-2.51)     | 0.7            | 0.97 (0.69-1.36)                              | 0.9            | 1.16 (0.85-1.59) | 0.7            |
| Black (801)                          | 1.65 (1.13-2.42) |                | 1.54 (1.09-2.18)     |                | 0.99 (0.76-1.31)                              |                | 1.26 (0.93-1.71) |                |
| Diabetes = No (699)                  | 1.33 (0.68-2.59) | 0.8            | 1.81 (0.71-4.59)     | 0.5            | 0.99 (0.75-1.32)                              | 0.9            | 1.24 (0.87-1.76) | 0.8            |
| Diabetes = Yes (571)                 | 1.47 (1.10-1.98) |                | 1.29 (0.93-1.80)     |                | 0.99 (0.80-1.21)                              |                | 1.18 (0.96-1.46) |                |
| Cardiac Disease = No (271)           | 1.14 (0.42-3.12) | 0.7            | 2.74 (0.53-14.1)     | 0.4            | 0.95 (0.56-1.62)                              | 0.9            | 1.21 (0.75-1.94) | 0.9            |
| Cardiac Disease = Yes (1005)         | 1.41 (1.03-1.91) |                | 1.35 (0.96-1.90)     |                | 0.98 (0.81-1.19)                              |                | 1.21 (0.99-1.47) |                |
| GI Disease = No (798)                | 1.71 (1.09-2.68) | 0.3            | 1.75 (0.86-3.57)     | 0.4            | 1.10 (0.87-1.38)                              | 0.1            | 1.31 (1.00-1.71) | 0.3            |
| GI Disease = Yes (478)               | 1.18 (0.76-1.83) |                | 1.15 (0.65-2.04)     |                | 0.85 (0.69-1.05)                              |                | 1.12 (0.88-1.41) |                |
| BMI < 18 kg/m <sup>2</sup> (42)      | 2.43 (0.66-8.94) | 0.4            | 4.66 (0.52-42.1)     | 0.2            | 2.09 (0.43-10.3)                              | 0.3            | 1.50 (0.48-4.71) | 0.7            |
| BMI 18 to 25 kg/m <sup>2</sup> (621) | 1.29 (0.78-2.14) |                | 1.20 (0.54-2.62)     |                | 1.05 (0.82-1.33)                              |                | 1.46 (1.06-2.00) |                |
| BMI > 25 kg/m <sup>2</sup> (613)     | 1.45 (0.93-2.25) |                | 1.45 (0.96-2.21)     |                | 0.91 (0.70-1.18)                              |                | 1.03 (0.78-1.38) |                |
| Albumin < 3.6 g/dL (566)             | 1.26 (0.82-1.94) | 0.4            | 1.18 (0.71-1.95)     | 0.3            | 0.95 (0.74-1.22)                              | 0.7            | 1.21 (0.94-1.56) | 0.9            |
| Albumin ≥ 3.6 g/dL (704)             | 1.72 (1.00-2.97) |                | 2.01 (0.97-4.14)     |                | 1.03 (0.77-1.39)                              |                | 1.21 (0.82-1.79) |                |
| Standard Dose (641)                  | 1.28 (0.76-2.15) | 0.6            | 1.32 (0.79-2.20)     | 0.7            | 0.95 (0.73-1.24)                              | 0.7            | 1.07 (0.75-1.53) | 0.3            |
| High Dose (635)                      | 1.53 (1.12-2.08) |                | 1.48 (0.93-2.36)     |                | 1.01 (0.84-1.22)                              |                | 1.36 (1.04-1.79) |                |
| Low-Flux (640)                       | 1.09 (0.71-1.67) | 0.1            | 1.15 (0.75-1.77)     | 0.2            | 0.91 (0.76-1.09)                              | 0.3            | 1.14 (0.87-1.49) | 0.6            |
| High-Flux (636)                      | 1.94 (1.17-3.21) |                | 1.77 (0.95-3.28)     |                | 1.02 (0.82-1.28)                              |                | 1.29 (0.95-1.74) |                |
| RKF = No (842)                       | 1.38 (0.96-1.99) | 0.8            | 1.28 (0.81-2.02)     | 0.6            | 1.09 (0.87-1.36)                              | 0.2            | 1.13 (0.86-1.48) | 0.3            |
| RKF = Yes (433)                      | 1.48 (0.89-2.47) |                | 1.78 (0.68-4.65)     |                | 0.80 (0.55-1.16)                              |                | 1.41 (1.07-1.86) |                |

*Abbreviation:* HR, Hazard Ratio; CI, Confidence Interval; SDMA, Symmetric Dimethylarginine; GI, Gastrointestinal; BMI, Body Mass Index; RKF, Residual Kidney Function

HR represents increase in risk per 2-fold increase in ADMA or SDMA concentrations. Modeled as natural log transformed variable/natural log of 2. Model 4 adjusted for age, sex, race, Index of Coexisting Disease (ICED) severity score, cause of end-stage renal disease, body mass index (categorized as <18, 18 to 25 and >25 kg/m<sup>2</sup>), systolic blood pressure (categorized as <130, 130-160 and >160 mm Hg), albumin, relative volume removed on dialysis and residual kidney function (urinary stdKt/V<sub>UREA</sub> calculated from urinary urea clearance).

<sup>1</sup> P-interactions between groups for the subgroup analyses.
