# Supplementary material
Source: PubMed Central journal article supplement (PMC5483385)
Supplement: NIHMS838359-supplement-7.pdf [file NIHMS838359-supplement-7.pdf]

**Table S6. Association of Baseline Medication Use with ADMA and SDMA Concentrations in HEMO Study**

| Medications              |     | Frequency   | ADMA, $\mu\text{M}$ |                | SDMA, $\mu\text{M}$ |                |
|--------------------------|-----|-------------|---------------------|----------------|---------------------|----------------|
|                          |     |             | Mean $\pm$ SD       | P <sup>1</sup> | Mean $\pm$ SD       | P <sup>1</sup> |
| ACE inhibitors           | Yes | 330 (25.9)  | 0.921 $\pm$ 0.232   | 0.6            | 4.25 $\pm$ 1.31     | 0.9            |
|                          | No  | 939 (73.6)  | 0.927 $\pm$ 0.228   |                | 4.27 $\pm$ 1.40     |                |
| $\beta$ -blockers        | Yes | 383 (30.0)  | 0.910 $\pm$ 0.215   | 0.4            | 4.27 $\pm$ 1.41     | 0.9            |
|                          | No  | 884 (69.3)  | 0.928 $\pm$ 0.238   |                | 4.26 $\pm$ 1.36     |                |
| Calcium channel blockers | Yes | 629 (49.3)  | 0.918 $\pm$ 0.222   | 0.9            | 4.33 $\pm$ 1.32     | 0.01           |
|                          | No  | 640 (50.2)  | 0.928 $\pm$ 0.240   |                | 4.20 $\pm$ 1.43     |                |
| $\alpha$ -1 antagonists  | Yes | 89 (7.0)    | 0.921 $\pm$ 0.264   | 0.6            | 4.12 $\pm$ 1.12     | 0.5            |
|                          | No  | 1177 (92.2) | 0.923 $\pm$ 0.229   |                | 4.27 $\pm$ 1.39     |                |
| Other antihypertensives  | Yes | 236 (18.5)  | 0.921 $\pm$ 0.227   | 0.8            | 4.33 $\pm$ 1.35     | 0.2            |
|                          | No  | 1032 (80.9) | 0.923 $\pm$ 0.232   |                | 4.25 $\pm$ 1.38     |                |
| Nitrates                 | Yes | 204 (16.0)  | 0.939 $\pm$ 0.219   | 0.1            | 3.92 $\pm$ 1.24     | <0.001         |
|                          | No  | 1069 (83.8) | 0.919 $\pm$ 0.233   |                | 4.33 $\pm$ 1.39     |                |
| Aspirin                  | Yes | 360 (28.2)  | 0.924 $\pm$ 0.231   | 0.9            | 4.03 $\pm$ 1.30     | <0.001         |
|                          | No  | 914 (71.6)  | 0.922 $\pm$ 0.231   |                | 4.35 $\pm$ 1.40     |                |
| Warfarin                 | Yes | 123 (9.6)   | 0.937 $\pm$ 0.232   | 0.5            | 3.92 $\pm$ 1.32     | <0.001         |
|                          | No  | 1149 (90.0) | 0.921 $\pm$ 0.231   |                | 4.30 $\pm$ 1.38     |                |
| Vitamin D                | Yes | 708 (55.5)  | 0.928 $\pm$ 0.245   | 0.7            | 4.30 $\pm$ 1.35     | 0.2            |
|                          | No  | 564 (44.2)  | 0.916 $\pm$ 0.214   |                | 4.22 $\pm$ 1.42     |                |
| Erythropoietin           | Yes | 1158 (90.8) | 0.924 $\pm$ 0.232   | 0.4            | 4.27 $\pm$ 1.38     | 0.3            |
|                          | No  | 117 (9.2)   | 0.908 $\pm$ 0.219   |                | 4.14 $\pm$ 1.32     |                |

Abbreviation: ADMA, Asymmetric Dimethylarginine; SDMA, Symmetric Dimethylarginine; SD, standard deviation; ACE, Angiotensin converting enzyme

<sup>1</sup> P-value by Wilcoxon-Mann-Whitney test
