# Supplementary material
Source: PubMed Central journal article supplement (PMC5483385)
Supplement: NIHMS838359-supplement-8.pdf [file NIHMS838359-supplement-8.pdf]

**Table S7. Association of Baseline Appetite with ADMA and SDMA Concentrations in HEMO Study**

| Description                                                                           | N (%)      | ADMA, $\mu\text{M}$ |                | SDMA, $\mu\text{M}$ |                |
|---------------------------------------------------------------------------------------|------------|---------------------|----------------|---------------------|----------------|
|                                                                                       |            | Mean $\pm$ SD       | P <sup>1</sup> | Mean $\pm$ SD       | P <sup>1</sup> |
| <b>During the past week (7 days), how would you rate your appetite?</b>               |            |                     |                |                     |                |
| Very good                                                                             | 390 (30.6) | 0.904 $\pm$ 0.232   | 0.01           | 4.273 $\pm$ 1.431   | 0.8            |
| Good                                                                                  | 477 (37.4) | 0.924 $\pm$ 0.238   |                | 4.254 $\pm$ 1.400   |                |
| Fair                                                                                  | 301 (23.6) | 0.933 $\pm$ 0.227   |                | 4.225 $\pm$ 1.298   |                |
| Poor                                                                                  | 86 (6.7)   | 0.955 $\pm$ 0.180   |                | 4.402 $\pm$ 1.250   |                |
| Very poor                                                                             | 22 (1.7)   | 0.971 $\pm$ 0.281   |                | 4.285 $\pm$ 1.566   |                |
| <b>During the past 4 weeks, to what extent were you bothered by lack of appetite?</b> |            |                     |                |                     |                |
| Not at all                                                                            | 648 (51.5) | 0.916 $\pm$ 0.242   | 0.3            | 4.243 $\pm$ 1.381   | 0.8            |
| Somewhat                                                                              | 312 (24.8) | 0.914 $\pm$ 0.195   |                | 4.303 $\pm$ 1.296   |                |
| Moderately                                                                            | 135 (10.7) | 0.943 $\pm$ 0.242   |                | 4.205 $\pm$ 1.305   |                |
| Very much                                                                             | 100 (7.9)  | 0.950 $\pm$ 0.244   |                | 4.146 $\pm$ 1.291   |                |
| Extremely                                                                             | 47 (3.7)   | 0.938 $\pm$ 0.224   |                | 4.341 $\pm$ 1.603   |                |

Abbreviation: ADMA, Asymmetric Dimethylarginine; SDMA, Symmetric Dimethylarginine; SD, standard deviation

<sup>1</sup> P-value by Wilcoxon-Mann-Whitney test
