# Supplementary material
Source: PubMed Central journal article supplement (PMC5483385)
Supplement: NIHMS838359-supplement-9.pdf [file NIHMS838359-supplement-9.pdf]

**Table S8: Day of the week and solute concentration in HEMO Study**

|                    | <b>D1<br/>(Monday or<br/>Tuesday)</b> | <b>D2<br/>(Wednesday or<br/>Thursday)</b> | <b>D3<br/>(Friday or<br/>Saturday)</b> | <b>P-trend</b> |
|--------------------|---------------------------------------|-------------------------------------------|----------------------------------------|----------------|
| N (%)              | 384 (30%)                             | 765 (60%)                                 | 127 (10%)                              |                |
|                    | Mean (SD)                             | Mean (SD)                                 | Mean (SD)                              |                |
| <b>Urea, mg/dL</b> | 68 (20)                               | 56 (17)                                   | 55 (17)                                | <0.001         |
| <b>ADMA, μM</b>    | 0.89 (0.21)                           | 0.93 (0.23)                               | 0.97 (0.27)                            | 0.001          |
| <b>SDMA, μM</b>    | 4.35 (1.31)                           | 4.20 (1.35)                               | 4.37 (1.70)                            | 0.08           |

Abbreviation: ADMA, Asymmetric Dimethylarginine; SDMA, Symmetric Dimethylarginine; SD, Standard Deviation
